# Supplementary material
Source: publisher figshare collection journal article supplement (https://diabetesjournals.figshare.com/articles/dataset/_/13034150)
Supplement: Supplementary file 1 [file 1]

Supplemental Table S2. Comparison of estimates from complete case analysis and that obtained using multiple imputation

|                                           | Cohort  | At least one fracture |       | Crude Hazards Ratio |                | Adj. Hazards Ratio** |                |
|-------------------------------------------|---------|-----------------------|-------|---------------------|----------------|----------------------|----------------|
|                                           | N       | n                     | row % | Est.                | 95% CI         | Est.                 | 95% CI         |
| <b>Males</b>                              |         |                       |       |                     |                |                      |                |
| <i>Complete case analysis*</i>            |         |                       |       |                     |                |                      |                |
| Type 2 diabetes                           |         |                       |       |                     |                |                      |                |
| No                                        | 216,229 | 10,836                | 5.0   | ref                 |                | ref                  |                |
| Yes                                       | 84,766  | 4,509                 | 5.3   | 0.867               | (0.837, 0.898) | 0.904                | (0.871, 0.937) |
| <i>Analysis using multiple imputation</i> |         |                       |       |                     |                |                      |                |
| Type 2 diabetes                           |         |                       |       |                     |                |                      |                |
| No                                        | 398,935 | 17,613                | 4.4   | ref                 |                | ref                  |                |
| Yes                                       | 93,270  | 4,956                 | 5.3   | 0.961               | (0.931, 0.992) | 0.972                | (0.940, 1.005) |
| <b>Females</b>                            |         |                       |       |                     |                |                      |                |
| <i>Complete case analysis*</i>            |         |                       |       |                     |                |                      |                |
| Type 2 diabetes                           |         |                       |       |                     |                |                      |                |
| No                                        | 209,832 | 21,503                | 10.2  | ref                 |                | ref                  |                |
| Yes                                       | 71,787  | 7,468                 | 10.4  | 0.858               | (0.835, 0.880) | 0.908                | (0.883, 0.933) |
| <i>Analysis using multiple imputation</i> |         |                       |       |                     |                |                      |                |
| Type 2 diabetes                           |         |                       |       |                     |                |                      |                |
| No                                        | 348,355 | 32,559                | 9.3   | ref                 |                | ref                  |                |
| Yes                                       | 80,974  | 8,358                 | 10.3  | 0.910               | (0.889, 0.932) | 0.938                | (0.915, 0.962) |

\*Excludes anyone with missing BMI or Townsend

\*\*Adjusted for baseline BMI, baseline Townsend, diagnosis year and age band

Supplemental Table S3. Number of fractures per person during observation period

| Number of fractures per person during observation period | Type 2 diabetes:   |       |                   |       |
|----------------------------------------------------------|--------------------|-------|-------------------|-------|
|                                                          | Yes<br>(N=174,244) |       | No<br>(N=747,290) |       |
|                                                          | n                  | col % | n                 | col % |
| <b>Males</b>                                             |                    |       |                   |       |
| 0                                                        | 88,314             | -     | 381,322           | -     |
| 1                                                        | 3,582              | 72.3  | 12,768            | 72.5  |
| 2                                                        | 978                | 19.7  | 3,372             | 19.1  |
| 3                                                        | 253                | 5.1   | 960               | 5.5   |
| 4                                                        | 81                 | 1.6   | 315               | 1.8   |
| 5                                                        | 29                 | 0.6   | 111               | 0.6   |
| 6 or more                                                | 33                 | 0.7   | 87                | 0.5   |
| <b>Females</b>                                           |                    |       |                   |       |
| 0                                                        | 72,616             | -     | 315,796           | -     |
| 1                                                        | 5,564              | 66.6  | 21,675            | 66.6  |
| 2                                                        | 1,870              | 22.4  | 7,383             | 22.7  |
| 3                                                        | 578                | 6.9   | 2,189             | 6.7   |
| 4                                                        | 193                | 2.3   | 789               | 2.4   |
| 5                                                        | 94                 | 1.1   | 342               | 1.1   |
| 6 or more                                                | 59                 | 0.7   | 181               | 0.6   |

Supplemental Table S4. Annual prevalence of fracture for those newly diagnosed with type 2 diabetes and a comparison group

|                | Type 2 diabetes:                 |     |                                                        |                                  |       |                                                        |
|----------------|----------------------------------|-----|--------------------------------------------------------|----------------------------------|-------|--------------------------------------------------------|
|                | Yes                              |     |                                                        | No                               |       |                                                        |
|                | N<br>(full year of<br>follow-up) | n   | ≥1 fracture<br>Rate per 1,000<br>person-years (95% CI) | N<br>(full year of<br>follow-up) | n     | ≥1 fracture<br>Rate per 1,000<br>person-years (95% CI) |
| <b>Males</b>   |                                  |     |                                                        |                                  |       |                                                        |
| Year*          |                                  |     |                                                        |                                  |       |                                                        |
| 2006           | 3,802                            | 106 | 27.9 (22.8, 33.7)                                      | 14,029                           | 500   | 35.6 (32.6, 38.9)                                      |
| 2007           | 5,663                            | 166 | 29.3 (25.0, 34.1)                                      | 20,535                           | 665   | 32.4 (30.0, 34.9)                                      |
| 2008           | 7,682                            | 225 | 29.3 (25.6, 33.4)                                      | 27,210                           | 852   | 31.3 (29.2, 33.5)                                      |
| 2009           | 9,182                            | 300 | 32.7 (29.1, 36.6)                                      | 32,959                           | 1,180 | 35.8 (33.8, 37.9)                                      |
| 2010           | 11,095                           | 374 | 33.7 (30.4, 37.3)                                      | 37,499                           | 1,321 | 35.2 (33.4, 37.2)                                      |
| 2011           | 13,154                           | 442 | 33.6 (30.5, 36.9)                                      | 44,405                           | 1,431 | 32.2 (30.6, 33.9)                                      |
| 2012           | 14,543                           | 438 | 30.1 (27.4, 33.1)                                      | 49,635                           | 1,625 | 32.7 (31.2, 34.4)                                      |
| 2013           | 15,516                           | 545 | 35.1 (32.2, 38.2)                                      | 52,350                           | 1,667 | 31.8 (30.3, 33.4)                                      |
| 2014           | 15,955                           | 555 | 34.8 (32.0, 37.8)                                      | 53,790                           | 1,715 | 31.9 (30.4, 33.4)                                      |
| 2015           | 12,547                           | 441 | 35.1 (31.9, 38.6)                                      | 40,966                           | 1,285 | 31.4 (29.7, 33.1)                                      |
| 2016           | 10,407                           | 363 | 34.9 (31.4, 38.7)                                      | 33,496                           | 1,098 | 32.8 (30.9, 34.8)                                      |
| 2017           | 8,141                            | 331 | 40.7 (36.4, 45.3)                                      | 26,856                           | 937   | 34.9 (32.7, 37.2)                                      |
| 2018           | 7,432                            | 279 | 37.5 (33.3, 42.2)                                      | 23,748                           | 853   | 35.9 (33.5, 38.4)                                      |
| <b>Females</b> |                                  |     |                                                        |                                  |       |                                                        |
| Year*          |                                  |     |                                                        |                                  |       |                                                        |
| 2006           | 3,846                            | 220 | 57.2 (49.9, 65.3)                                      | 15,085                           | 956   | 63.4 (59.4, 67.5)                                      |
| 2007           | 5,601                            | 288 | 51.4 (45.7, 57.7)                                      | 21,507                           | 1,383 | 64.3 (61.0, 67.8)                                      |
| 2008           | 7,434                            | 399 | 53.7 (48.5, 59.2)                                      | 27,680                           | 1,772 | 64.0 (61.1, 67.1)                                      |
| 2009           | 9,049                            | 596 | 65.9 (60.7, 71.4)                                      | 33,225                           | 2,316 | 69.7 (66.9, 72.6)                                      |
| 2010           | 10,685                           | 713 | 66.7 (61.9, 71.8)                                      | 38,152                           | 2,789 | 73.1 (70.4, 75.9)                                      |
| 2011           | 12,043                           | 805 | 66.8 (62.3, 71.6)                                      | 42,635                           | 2,841 | 66.6 (64.2, 69.1)                                      |
| 2012           | 13,072                           | 819 | 62.7 (58.4, 67.1)                                      | 46,295                           | 3,115 | 67.3 (64.9, 69.7)                                      |
| 2013           | 13,712                           | 853 | 62.2 (58.1, 66.5)                                      | 47,814                           | 3,338 | 69.8 (67.5, 72.2)                                      |
| 2014           | 13,914                           | 952 | 68.4 (64.1, 72.9)                                      | 47,757                           | 3,330 | 69.7 (67.4, 72.1)                                      |
| 2015           | 10,884                           | 683 | 62.8 (58.1, 67.6)                                      | 36,522                           | 2,566 | 70.3 (67.6, 73.0)                                      |
| 2016           | 8,948                            | 687 | 76.8 (71.1, 82.7)                                      | 29,818                           | 2,152 | 72.2 (69.2, 75.3)                                      |
| 2017           | 7,141                            | 554 | 77.6 (71.3, 84.3)                                      | 23,955                           | 1,955 | 81.6 (78.0, 85.3)                                      |
| 2018           | 6,214                            | 502 | 80.8 (73.9, 88.2)                                      | 21,107                           | 1,770 | 83.9 (80.0, 87.9)                                      |

\*Only a very small percentage of patients had a full year of follow-up prior to 2006 so not presented
